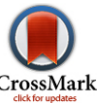

## Correction

# Correction: Expression of a Vacuole-Localized BURP-Domain Protein from Soybean (SALI3-2) Enhances Tolerance to Cadmium and Copper Stresses

The *PLOS ONE* Staff

The authors are listed out of order. Please view the correct author order, affiliations, and citation here:

Yulin Tang<sup>1</sup>, Yan Cao<sup>2</sup>, Zhan Gao<sup>1</sup>, Zhonghua Ou<sup>1</sup>, Yajing Wang<sup>1</sup>, Jianbin Qiu<sup>2</sup>, Yizhi Zheng<sup>1</sup>

<sup>1</sup> Shenzhen Key Laboratory of Microbial and Gene Engineering, College of Life Sciences, Shenzhen University, Shenzhen, Guangdong, People's Republic of China

<sup>2</sup> The Key Laboratory for Marine Bioresource and Eco-environmental Science, College of Life Sciences, Shenzhen University, Shenzhen, Guangdong, People's Republic of China

Tang Y, Cao Y, Gao Z, Ou Z, Wang Y, et al. (2014) Expression of a Vacuole-Localized BURP-Domain Protein from Soybean (SALI3-2) Enhances Tolerance to Cadmium and Copper Stresses. *PLoS ONE* 9(6): e98830. doi:10.1371/journal.pone.0098830

## Reference

1. Tang Y, Cao Y, Qiu J, Gao Z, Ou Z, et al. (2014) Expression of a Vacuole-Localized BURP-Domain Protein from Soybean (SALI3-2) Enhances Tolerance to Cadmium and Copper Stresses. *PLoS ONE* 9(6): e98830. doi:10.1371/journal.pone.0098830

**Citation:** The *PLOS ONE* Staff (2014) Correction: Expression of a Vacuole-Localized BURP-Domain Protein from Soybean (SALI3-2) Enhances Tolerance to Cadmium and Copper Stresses. *PLoS ONE* 9(8): e107337. doi:10.1371/journal.pone.0107337

**Published:** August 29, 2014

**Copyright:** © 2014 The *PLOS ONE* Staff. This is an open-access article distributed under the terms of the Creative Commons Attribution License, which permits unrestricted use, distribution, and reproduction in any medium, provided the original author and source are credited.
